# Supplementary material for: Shape memory effect and rapid reversible actuation of nanocomposite hydrogels with electrochemically controlled local metal ion coordination and crosslinking
Source: Royal Society of Chemistry journal article supplement (doi:10.1039/d0tb02029j), 2020-01-01
Supplement: d0tb02029j3.pdf [file d0tb02029j3.pdf]

## Electronic Supplementary Information

# Shape Memory Effect and Rapid Reversible Actuation of Nanocomposite Hydrogels with Electrochemically Controlled Local Metal Ion Coordination and Crosslinking

Yang Cong, Shuhui Liu, Fengxiang Wu, Hua Zhang, and Jun Fu\*

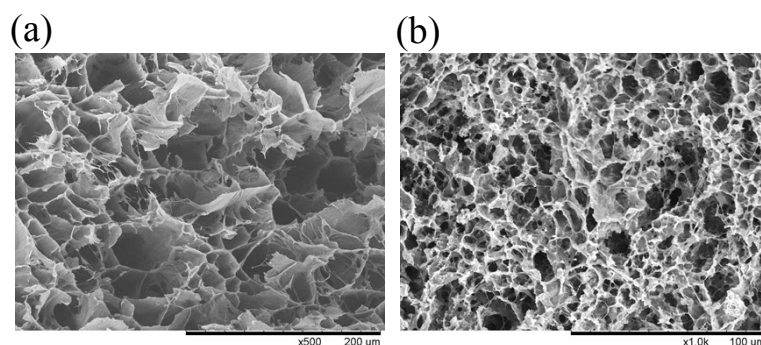

**Figure S1.** SEM images of the aPAAM/MMT hydrogels before (a) and after (b)  $\text{Fe}^{3+}$  coordination and crosslinking.

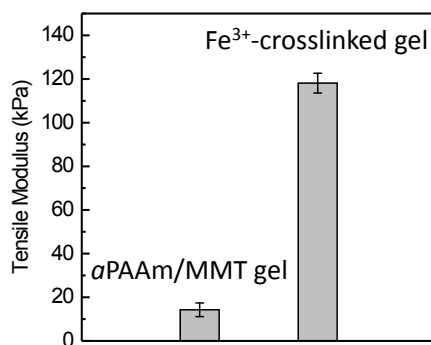

**Figure S2.** Tensile modulus values of hydrogels before and after  $\text{Fe}^{3+}$  crosslinking.

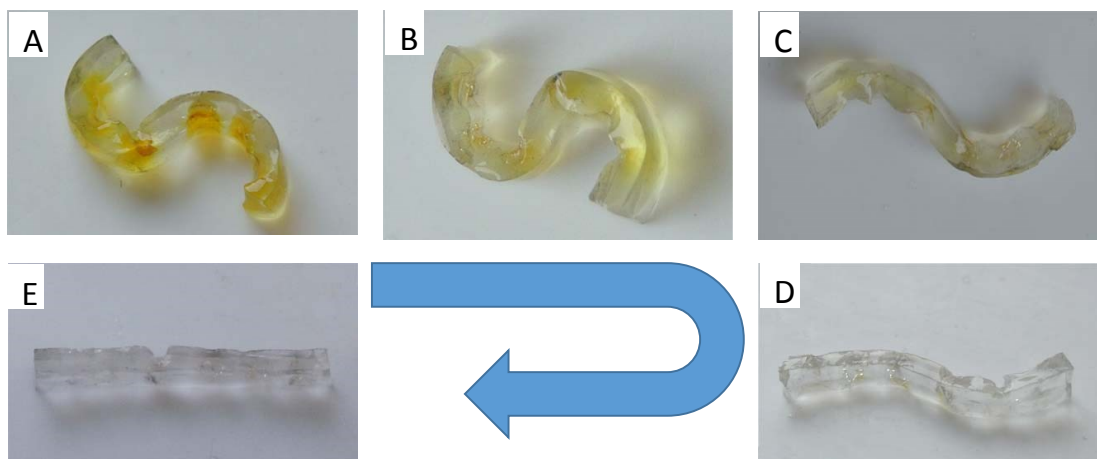

**Figure S3.** The hydrogel stripe was printed by using an iron electrode array to create six local coordination and crosslinking to generate an S-shaped structure. The S-shaped structure recovered to its original straight line when the  $\text{Fe}^{3+}$  ions were removed by immersing in 0.1 mol/L EDTA solution. This procedure is repeatable.
